# Supplementary material
Source: PubMed Central journal article supplement (PMC2758011)

**Supplementary Figure 2. Overlay of the 2D-<sup>15</sup>N-edited NOESY HSQC spectra for uniformly <sup>2</sup>H, <sup>15</sup>N-labeled GIRKCP in complex with spermine.**

The spectra for wild type GIRKCP and the mutants Q227A and Q261A in complex with spermine are shown in gray, blue, and magenta, respectively. The assignments of the intermolecular NOE signals are indicated for the wild type spectra. It should be noted that the mutations affect the chemical shifts of the side chain amide group of Q227 and Q261 of the mutants Q261A and Q227A, respectively.

# Q227/Q261 HN(side chain)

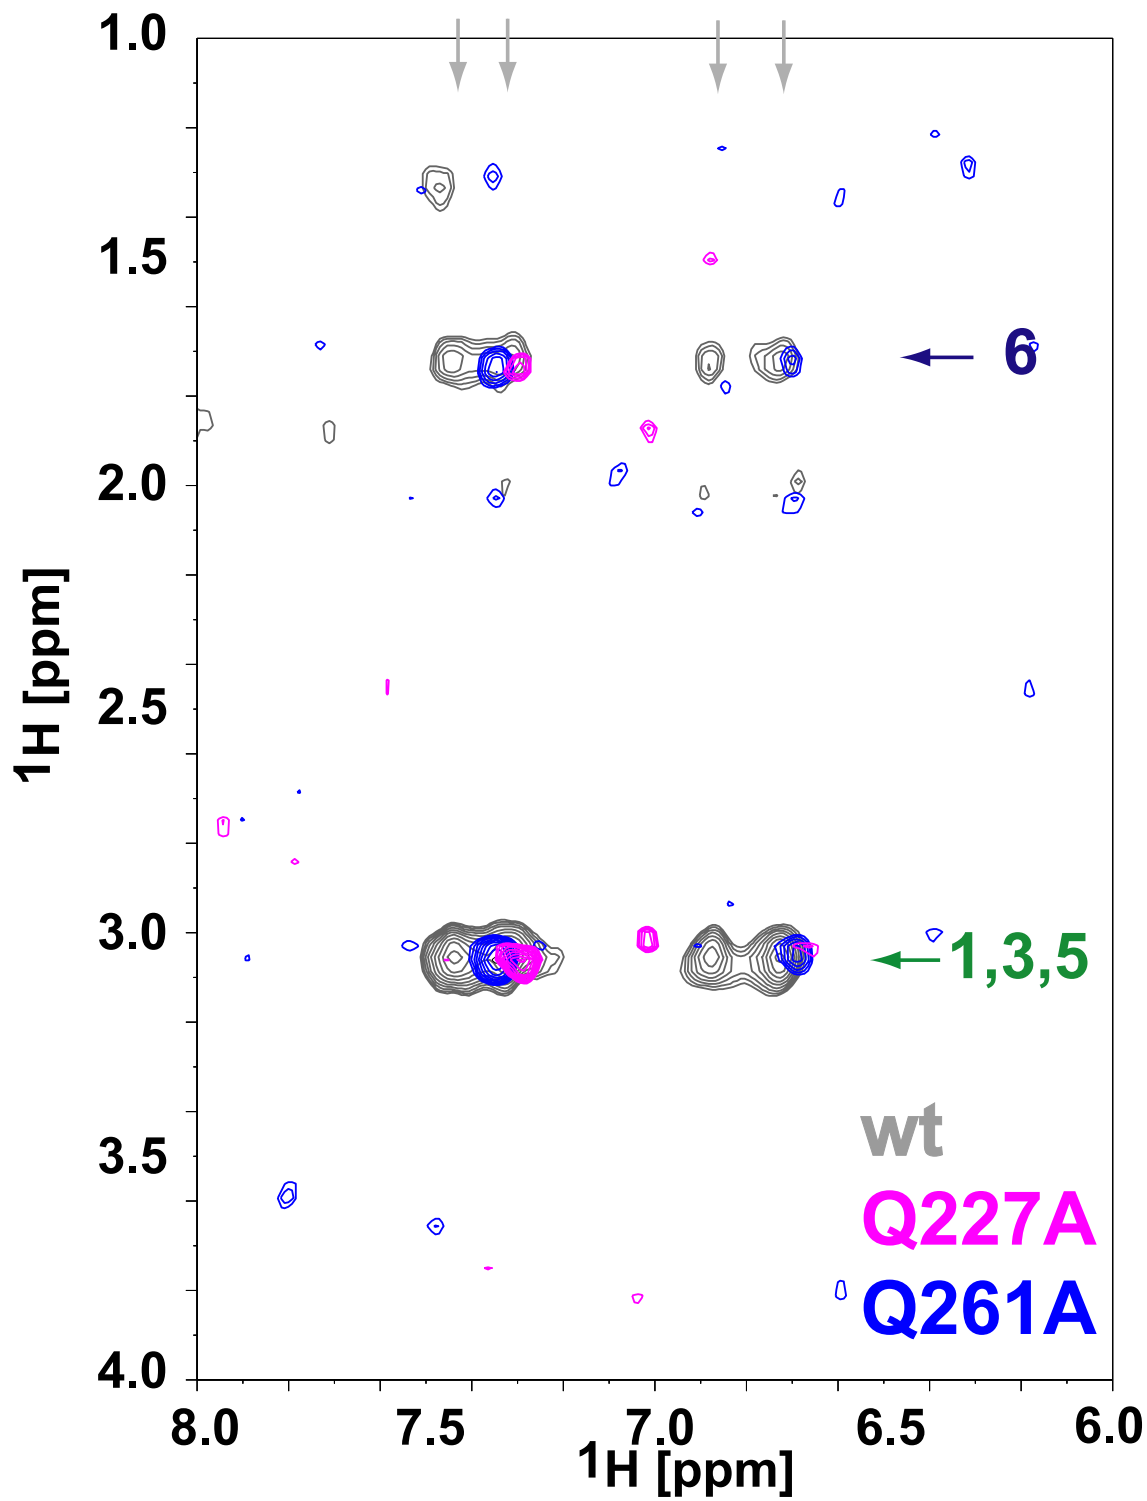

Supplement: supp_M109.029355_jbc.M109.029355-2.pdf [file supp_M109.029355_jbc.M109.029355-2.pdf]
